# Supplementary material
Source: PubMed Central journal article supplement (PMC7486336)
Supplement: mmc1.pdf [file mmc1.pdf]

## SUPPLEMENTARY REFERENCES

- S1. S. Kissling, S. Rotman, C. Gerber, et al., Collapsing glomerulopathy in a COVID-19 patient, *Kidney Int* **5**, 2020, 935-939.
- S2. C.S. Goldsmith, S.E. Miller, R.B. Martines, et al., Electron microscopy of SARS-CoV-2: a challenging task, *Lancet* **395**, 2020, e99.
- S3. E. Calomeni, A. Satoskar, I. Ayoub, et al., Multivesicular bodies (MVB) mimicking SARS-CoV-2 in patients without COVID-19, *Kidney Int* **98**, 2020, 233-234.
- S4. S. Nydegger, S. Khurana, D.N. Kremmentsov, et al., Mapping of tetraspanin-enriched microdomains that can function as gateways for HIV-1, *J Cell Biol* **173**, 2006, 795-807.
